# Supplementary material for: In situgrowth and activation of an amorphous MoSxcatalyst on Co-containing metal–organic framework nanosheets for highly efficient dye-sensitized H2evolution
Source: Royal Society of Chemistry journal article supplement (doi:10.1039/c8nj05995k), 2019-01-01
Supplement: c8nj05995k1.pdf [file c8nj05995k1.pdf]

## **Electronic Supplementary Information (ESI) for New Journal of Chemistry**

### ***In situ* growth and activation of an amorphous MoS<sub>x</sub> catalyst on Co-containing metal-organic framework nanosheets for highly efficient dye-sensitized H<sub>2</sub> evolution**

Xiangyu Liu<sup>a,b</sup>, Shixiong Min<sup>a,b,\*</sup>, Yuan Xue<sup>a,b</sup>, Lei Tian<sup>a,b</sup>, Yonggang Lei<sup>a,b</sup>, Fang  
Wang<sup>a,b\*</sup>

<sup>a</sup> *School of Chemistry and Chemical Engineering, Key Laboratory of Electrochemical  
Energy Conversion Technology and Application, North Minzu University, Yinchuan  
750021, P. R. China.*

<sup>b</sup> *Key Laboratory of Chemical Engineering and Technology, State Ethnic Affairs  
Commission, North Minzu University, Yinchuan, 750021, P. R. China.*

*Corresponding authors: [sxmin@nun.edu.cn](mailto:sxmin@nun.edu.cn); [wangfang987@126.com](mailto:wangfang987@126.com)*

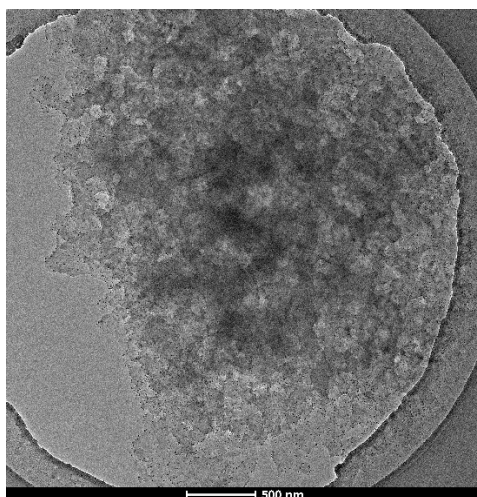

**Fig. S1** Low-magnification TEM image of Co-BDC NSs.

**Table S1** Zeta potentials of different synthetic systems in TEOA aqueous solution (10%, pH 8).

| Sample                                        | Zeta potential (mV) <sup>a</sup> |
|-----------------------------------------------|----------------------------------|
| Co-BDC NSs                                    | -4.69                            |
| MoS <sub>4</sub> <sup>2-</sup>                | -2.64                            |
| Co-BDC NSs/MoS <sub>4</sub> <sup>2-</sup>     | -6.54                            |
| ErB/MoS <sub>4</sub> <sup>2-</sup>            | -1.99                            |
| ErB/Co-BDC NSs/MoS <sub>4</sub> <sup>2-</sup> | -3.30                            |

<sup>a</sup>Co-BDC NSs, 0.1 mg mL<sup>-1</sup>; MoS<sub>4</sub><sup>2-</sup>, 0.1 mM; ErB, 0.1 mM.

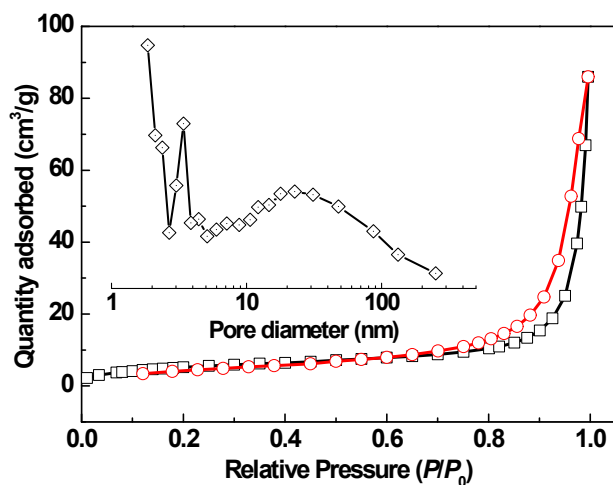

**Fig. S2** N<sub>2</sub> adsorption-desorption isotherm and pore size distribution (inset) of Co-BDC NSs

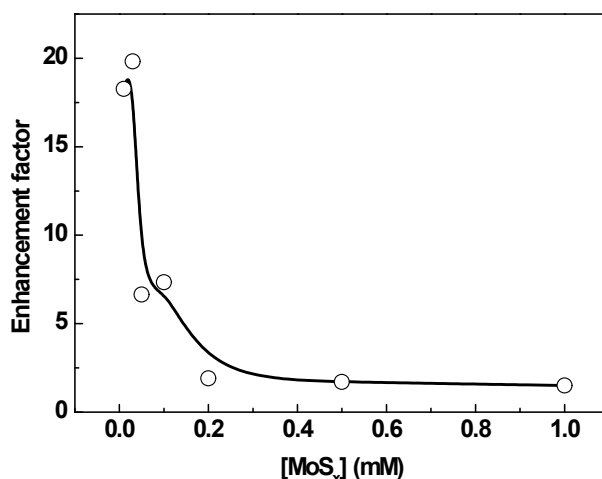

**Fig. S3** Enhancement factor of H<sub>2</sub> evolution from ErB-TEOA system by comparing MoS<sub>x</sub> and Co-BDC NSs/MoS<sub>x</sub> catalysts under visible light irradiation. Reaction conditions: ErB, 0.1 mM; Co-BDC NSs, 5 mg; 100 mL TEOA solution, 10%, pH 8; 30-W LED lamp,  $\lambda \geq 450$  nm.

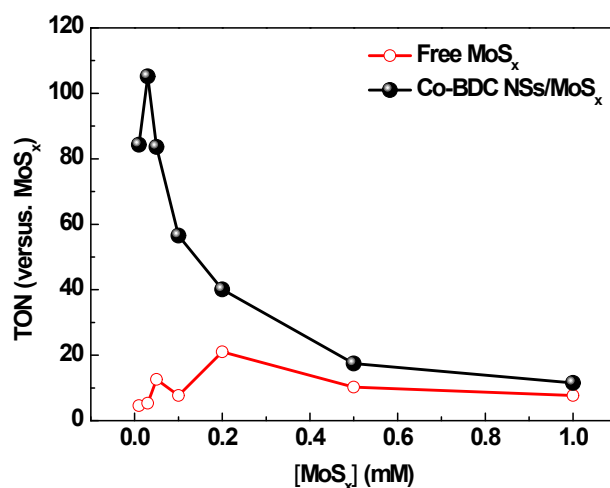

**Fig. S4** TONs of H<sub>2</sub> evolution catalyzed by free MoS<sub>x</sub> and Co-BDC NSs/MoS<sub>x</sub> catalysts as a function of MoS<sub>x</sub> concentration after 6 h irradiation. Reaction conditions: ErB, 0.1 mM; Co-BDC NSs, 5 mg; 100 mL TEOA solution, 10%, pH 8; 30-W LED lamp,  $\lambda \geq 450$  nm.

**Table S2** Photocatalytic H<sub>2</sub> evolution activity of Co-BDC NSs/MoS<sub>x</sub> catalyst in this work, in comparison with several representative results with high performance non-noble metal based catalysts from recent publications.

| Photocatalytic H <sub>2</sub> evolution system | Light source | H <sub>2</sub> evolution activity (mmol·h <sup>-1</sup> ·g <sup>-1</sup> ) | Apparent quantum efficiency (AQE) | TON <sub>cat</sub> | Ref. |
|------------------------------------------------|--------------|----------------------------------------------------------------------------|-----------------------------------|--------------------|------|
|                                                |              |                                                                            |                                   |                    |      |

|                                                                                                                                       |                                                      |      |                 |         |           |
|---------------------------------------------------------------------------------------------------------------------------------------|------------------------------------------------------|------|-----------------|---------|-----------|
| 5 mg Co-BDC NSs, 0.03 mM MoS <sub>x</sub> , 0.1 mM ErB, 10% TEOA, pH=8                                                                | 30-W white-light LED lamp ( $\lambda \geq 450$ nm)   | 4.8  | 15% at 500 nm   | 105.2   | This work |
| 10 mg ATP/Co(OH) <sub>2</sub> , 0.05 mM MoS <sub>x</sub> , 0.2 mM ErB, 10% TEOA, pH=8                                                 | 30-W white-light LED lamp ( $\lambda \geq 450$ nm)   | 16.8 | 47.7% at 500 nm | 363     | [1]       |
| 5 mg CoAl-LDH NSs, 0.1 mM MoS <sub>x</sub> , 0.5 mM ErB, 15% TEOA, pH=8                                                               | 300-W Xe lamp ( $\lambda \geq 420$ nm)               | 21.5 | 4.3% at 520 nm  | 174.2   | [2]       |
| 10mg GQDs, $8.98 \times 10^{-5}$ M MoS <sub>x</sub> , $5.98 \times 10^{-5}$ M Co <sup>2+</sup> , 1 mM ErB, 15% TEOA, pH=7             | 300-W Xe lamp ( $\lambda \geq 420$ nm)               | 17.4 | none            | 118.0   | [3]       |
| 100 mg g-C <sub>3</sub> N <sub>4</sub> , 0.039 mM MoS <sub>x</sub> , 0.0125 mM ErB, 0.79 M TEOA, pH=7                                 | 400-W High pressure Hg lamp ( $\lambda \geq 420$ nm) | 0.3  | 8.3% at 545 nm  | 32.1    | [4]       |
| 50 mg MoS <sub>x</sub> -rGO/TiO <sub>2</sub> (0.5wt%), 10% methanol                                                                   | Four LED lamp (3W, 365 nm)                           | 4.1  | none            | 264.4   | [5]       |
| 10 mg MoS <sub>x</sub> /CdS/Co <sub>3</sub> O <sub>4</sub> , 10% lactic acid                                                          | 5-W light emitting diode lamp                        | 10.8 | none            | 576.2   | [6]       |
| 3 mg 0.14 wt% MoS <sub>2</sub> QD/Bi <sub>2</sub> S <sub>3</sub> , 0.5 M Na <sub>2</sub> S/Na <sub>2</sub> SO <sub>3</sub>            | 500-W Xe arc lamp                                    | 17.7 | none            | 24274.3 | [7]       |
| 100 mg 0.5 wt% MoS <sub>2</sub> /PQ, 0.2 M TEOA, pH=7                                                                                 | 300-W Xe lamp ( $\lambda \geq 420$ nm)               | 0.08 | none            | 20.4    | [8]       |
| 20 mg Zn <sub>0.2</sub> Cd <sub>0.8</sub> S/MoS <sub>2</sub> -3%, Na <sub>2</sub> S (0.35 M)/Na <sub>2</sub> SO <sub>3</sub> (0.25 M) | 300-W Xe lamp ( $\lambda \geq 420$ nm)               | 0.4  | none            | 8.8     | [9]       |
| 20 mg MoS <sub>2</sub> /RGO, 0.4 mM EY, 15% TEOA, pH=7                                                                                | 300-W Xe lamp ( $\lambda \geq 420$ nm)               | 1.9  | 24% at 460 nm   | 450.8   | [10]      |
| 50 mg rGO1.5/CdS/MoS <sub>2</sub> (1.5 wt %), 10% lactic acid, pH=11                                                                  | 350-W Xe lamp ( $\lambda \geq 420$ nm)               | 1.9  | none            | 22.7    | [11]      |
| Co(NO <sub>3</sub> ) <sub>2</sub> +(NH <sub>4</sub> ) <sub>2</sub> MoS <sub>4</sub> =1 mM, (Co:Mo=4:6), 2 mM ErB, 15% TEOA,           | 300-W Xe lamp ( $\lambda \geq 420$ nm)               | 53.6 | none            | 100     | [12]      |

|                                                                                                                                                                                   |                                            |      |                 |         |      |
|-----------------------------------------------------------------------------------------------------------------------------------------------------------------------------------|--------------------------------------------|------|-----------------|---------|------|
| pH=9                                                                                                                                                                              |                                            |      |                 |         |      |
| 100 mg TiO <sub>2</sub> , 0.119 mM (NH <sub>4</sub> ) <sub>2</sub> MoS <sub>4</sub> , 0.78 mM EY, 10% TEOA, pH=10.7                                                               | 1000-W Xe arc lamp (AM 1.5 G filter)       | 1.6  | none            | 8.1     | [13] |
| 50 mg MoS <sub>x</sub> /CdS-0.2 wt%, 10% lactic acid                                                                                                                              | 300-W Xe lamp ( $\lambda \geq 400$ nm)     | 8.1  | none            | 1515    | [14] |
| 4 mM MoS <sub>x</sub> , 2 mM ErB, 10% TEOA, pH=8.1                                                                                                                                | 300-W Xe lamp ( $\lambda \geq 420$ nm)     | 9.6  | none            | 25      | [15] |
| 17 mg [Mo <sub>3</sub> S <sub>13</sub> ] <sup>2-</sup> /MIL-125-NH <sub>2</sub> (0.82 wt%), MeCN:TEA:H <sub>2</sub> O=7 9:16:5                                                    | 300-W Xe lamp ( $\lambda \geq 420$ nm)     | 2.1  | 11.8% at 450 nm | 2157.5  | [16] |
| 17 mg 1T-MoS <sub>2</sub> /MIL-125-NH <sub>2</sub> (0.82 wt%), MeCN:TEA:H <sub>2</sub> O=7 9:16:5                                                                                 | 300-W Xe lamp ( $\lambda \geq 420$ nm)     | 1.5  | 5.8% at 450 nm  | 340.5   | [16] |
| 10 $\mu$ M [Mo <sub>3</sub> S <sub>13</sub> ] <sup>2-</sup> , 100 $\mu$ M Ru(bpy) <sub>3</sub> Cl <sub>2</sub> , CH <sub>3</sub> CN:H <sub>2</sub> O=9:1, 100 mM H <sub>2</sub> A | 300-W Xe lamp ( $\lambda \geq 420$ nm)     | 14.5 | none            | 1570    | [17] |
| 40 mg CdS/WS <sub>x</sub> (12 wt%), 10% lactic solution                                                                                                                           | 300-W Xe lamp ( $\lambda \geq 420$ nm)     | 19.0 | 14.7% at 420 nm | 253.7   | [18] |
| NiS <sub>x</sub> /graphene (46.7 wt%), 1 mM EY, 10% TEOA, pH=7,                                                                                                                   | 300-W Xe lamp ( $\lambda \geq 420$ nm)     | 12.4 | 32.5% at 430 nm | 18.5    | [19] |
| 100 mg Cd <sub>0.5</sub> Zn <sub>0.5</sub> S/NiS <sub>x</sub> , Na <sub>2</sub> S (0.35 M)/Na <sub>2</sub> SO <sub>4</sub> (0.25 M)                                               | Xe lamp ( $\lambda \geq 430$ nm)           | 44.6 | 95% at 425 nm   | 18374.5 | [20] |
| 200 mg NiS <sub>x</sub> /C <sub>3</sub> N <sub>4</sub> (5 wt%), 20% TEOA                                                                                                          | 300-W Xe lamp ( $\lambda \geq 420$ nm)     | 2.0  | 3.2% at 405 nm  | 59.2    | [21] |
| 50 mg a-MoS <sub>x</sub> /gC <sub>3</sub> N <sub>4</sub> , 10% lactic acid                                                                                                        | 3W-LED ( $\lambda \geq 420$ nm)            | 0.3  | none            | 8.7     | [22] |
| 50 mg Ni(OH) <sub>2</sub> /g-C <sub>3</sub> N <sub>4</sub> (0.5 mol%), 10% TEOA                                                                                                   | 350-W Xe arc lamp ( $\lambda \geq 400$ nm) | 0.2  | 1.1% at 420 nm  | 16.78   | [23] |

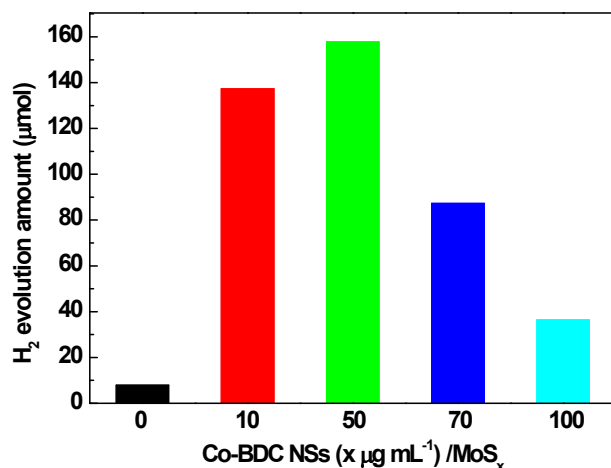

**Fig. S5** H<sub>2</sub> evolution amounts over different Co-BDC NSs/MoS<sub>x</sub> catalysts sensitized by ErB (0.1 mM) from TEOA solution, where different concentrations Co-BDC NSs were added. Reaction conditions: MoS<sub>x</sub>, 0.03 mM; 100 mL TEOA solution, 10%, pH 8; 30-W LED lamp,  $\lambda \geq 450$  nm.

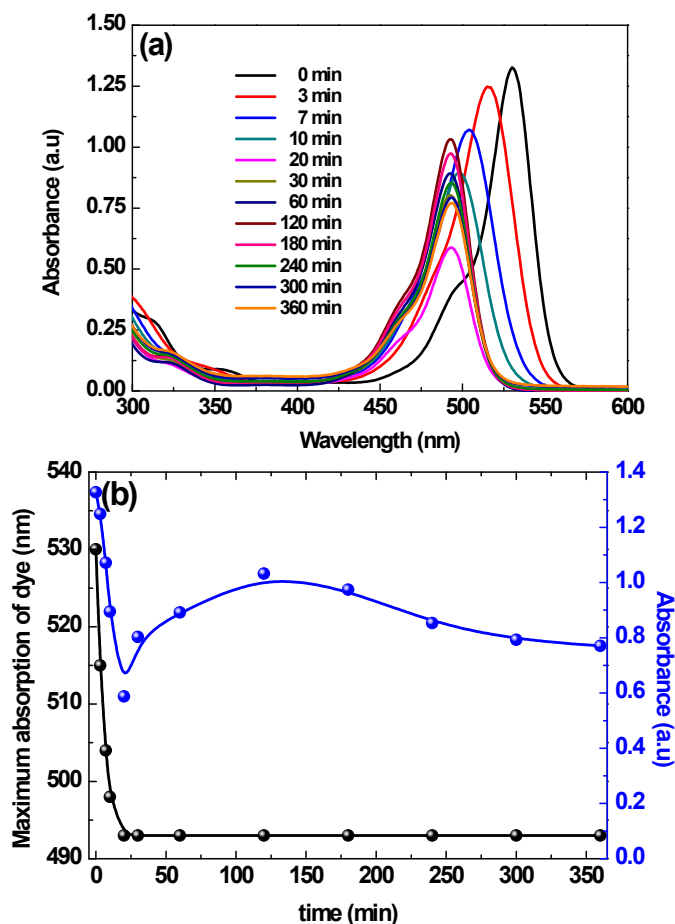

**Fig. S6** (a) UV-vis absorption spectra of ErB in TEOA solution during the photocatalytic H<sub>2</sub> reaction from ErB-sensitized Co-BDC NSs/MoS<sub>x</sub> as a function of light irradiation time. (b) The variations of maximum wavelength and absorbance of ErB during the photocatalytic H<sub>2</sub> reaction as a function of light irradiation time.

Reaction conditions: ErB, 0.1 mM; Co-BDC NSs, 5 mg; MoS<sub>x</sub>, 0.03 mM; 100 mL  
TEOA solution, 10%, pH 8; 30-W LED lamp, λ ≥ 450 nm.

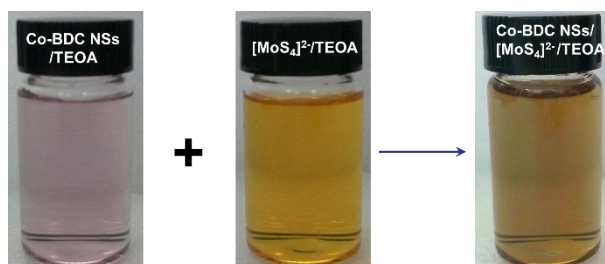

**Fig. S7** Digital photos of Co-BDC NSs, [MoS<sub>4</sub>]<sup>2-</sup>, and Co-BDC NSs/[MoS<sub>4</sub>]<sup>2-</sup> mixture in TEOA.

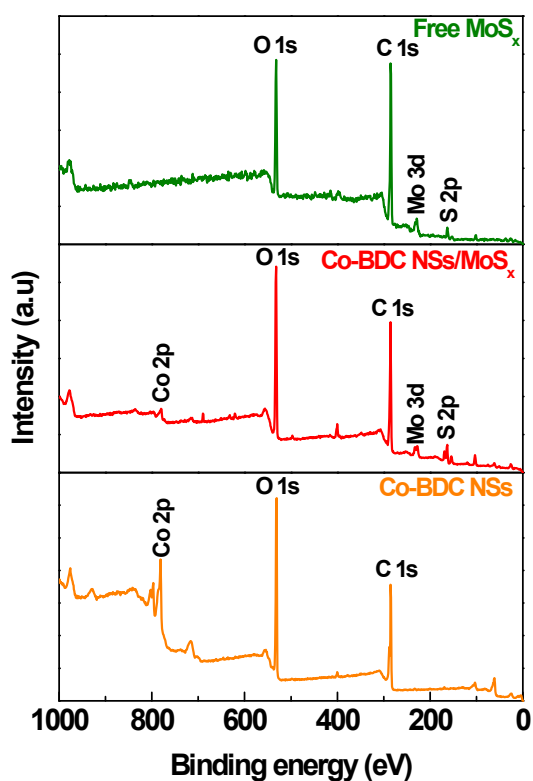

**Fig. S8** XPS survey spectra of free MoS<sub>x</sub>, Co-BDC NSs, and Co-BDC NSs/MoS<sub>x</sub> catalysts.

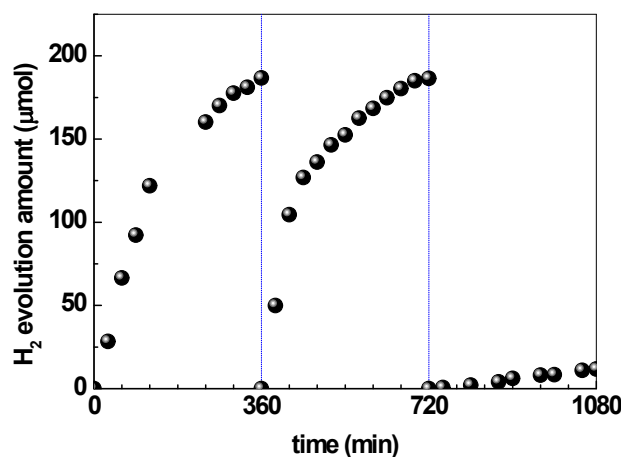

**Fig. S9** The stability of photocatalytic H<sub>2</sub> evolution over Co-BDC NSs/MoS<sub>x</sub> catalysts from ErB-TEOA system. Reaction conditions: ErB, 0.1 mM; Co-BDC NSs, 15 mg; MoS<sub>x</sub>, 0.09 mM; 100 mL TEOA solution, 10%, pH 8; 30-W LED lamp,  $\lambda \geq 450$  nm.

### References

1. X. Y. Liu, Y. Xue, Y. G. Lei, F. Wang and S. X. Min, *ACS Appl. Nano Mater.*, 2018, **1**, 6393-6501.
2. S. Min, J. Hou, Y. Lei, X. Liu, Y. Li, Y. Xue, E. Cui, W. Yan, W. Hai, F. Wang, *Chem. Commun.*, 2018, **54**, 3243-3246.
3. Y. G. Lei, J. H. Hou, F. Wang, X. H. Ma, Z. L. Jin, J. Xu and S. X. Min, *Applied Surface Science*, 2017, **420**, 456-464.
4. J. Y. Xu, Y. X. Li and S. Q. Peng, *Int. J. Hydrogen Energy*, 2015, **40**, 353-362.
5. Y. Xu, Y. G. Li, P. Wang, X. F. Wang and H. G. Yu, *Applied Surface Science*, 2018, **430**, 176-183.
6. H. Yang, Z. L. Jin, G. R. Wang, D. D. Liu and K. Fan, *Dalton Trans*, 2018, **175**, 6973-6985.
7. W. P. C. Lee, X. Y. Kong, L. L. Tan, M. M. Gui, S. Sumathi and S. P. Chai, *Applied Catalysis B: Environ.*, 2018, **232**, 117-123.
8. Y. J. Yuan, Z. T. Yu, Y. H. Li, H. W. Lu, X. Chen, W. G. Tu, Z. G. Ji and Z. G. Zou, *Applied Catalysis B: Environ.*, 2016, **181**, 16-23.
9. M. Nguyen, P. D. Tran, S. S. Pramana, R. L. Lee, S. K. Batabyal, N. M. Mathews, L. H. Wong, and M. Graetzel, *Nanoscale*, 2013, **5**, 1479-1482.
10. S. X. Min and G. X. Lu, *J. Phys. Chem. C*, 2012, **116**, 25415-25424.



11. Y. X. Li, H. Wang and S. Q. Peng, *J. Phys. Chem. C*, 2014, **118**, 19842-19848.
12. J. H. Hou, Y. G. Lei, F. Wang, X. H. Ma, S. X. Min, Z. L. Jin and J. Xu, *Int. J. Hydrogen Energy*, 2017, **42**, 11118-11129.
13. G. Malekshoar and A. K. Ray, *Chemical Engineering Science*, 2016, **152**, 35-44.
14. X. L. Fu, L. Zhang, L. H. Liu, H. Li, S. G. Meng, X. J. Ye and S. F. Chen, *J. Mater. Chem. A*, 2017, **5**, 15287-15293.
15. X. Zong, Z. Xing, H. Yu, Y. Bai, G. Q. Lu, L. Z. Wang, *J. Cata.*, 2014, **310**, 51-56.
16. T. N. Nguyen, S. Kampouri, B. Valizadeh, W. Luo, D. Ongari, O. M. Planes, A. Zuttel, B. Smit, K. C. Stylianou, *ACS Appl. Mater. Interfaces*, 2018, **10**, 30035-30039.
17. Y. G. Lei, M. Q. Yang, J. H. Hou, F. Wang, E. T. Cui and S. X. Min, *Chem. Comm.*, 2018, **54**, 603-606.
18. S. X. Min, Y. G. Lei, H. Z. Sun, J. H. Hou, F. Wang, E. T. Cui, S. X. She, Z. L. Jin, J. Xu and X. H. Ma, *Molecular Catalysis*, 2017, **440**, 190-198.
19. C. Kong, S. X. Min and G. X. Lu, *ACS Catal.*, 2014, **4**, 2763-2769.
20. M. C. Liu, Y. B. Chen, J. Z. Su, J. W. Shi, X. X. Wang, and L. J. Guo, *Nat. Energy*, 2016, **1**, 16151.
21. C. Z. Sun, H. Zhang, H. Liu, X. X. Zheng, W. X. Zou and L. Qi, *Applied Catalysis B: Environ.*, 2018, **235**, 66-74.
22. H. G. Yu, P. Xiao, P. Wang and J. G. Yu, *Applied Catalysis B: Environ.*, 2016, **193**, 217-225.
23. J. G. Yu, S. H. Wang, B. Cheng, Z. Lin and F. Huang, *Cataly. Sci. Technol.*, 2013, **3**, 1782-1789.
